# Supplementary material
Source: Springer Nature journal article supplement (https://www.springermedizin.de/resource/supplementary/12936_2013_3064_MOESM4_ESM.pdf/9545022)
Supplement: MOESM4 [file 9545022]

# Unit Costs of Malaria Rapid Diagnostic Tests over Time

Unit cost in USD

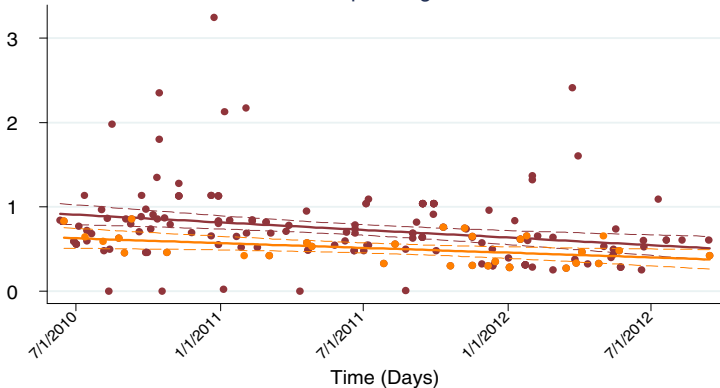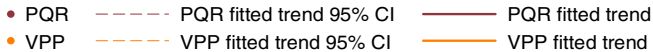

PQR Coef.=-.000 (P=.001)

PQR vs VPP (fitted trends) P=.584

VPP Coef.=-.000 (P=.017)
